# Supplementary material
Source: MDPI journal article supplement (https://www.mdpi.com/2304-6740/11/10/416)
Supplement: s1 [file s1 › inorganics-2662923-supplementary.pdf]

## Effect of Cation Incorporation on the Vibrational Properties of Mixed Lead Chloride Perovskite Single Crystals

Syed Bilal Junaid <sup>1</sup>, Furqanul Hassan Naqvi <sup>1</sup> and Jae Hyeon Ko <sup>1,\*</sup>

### Supplementary Information

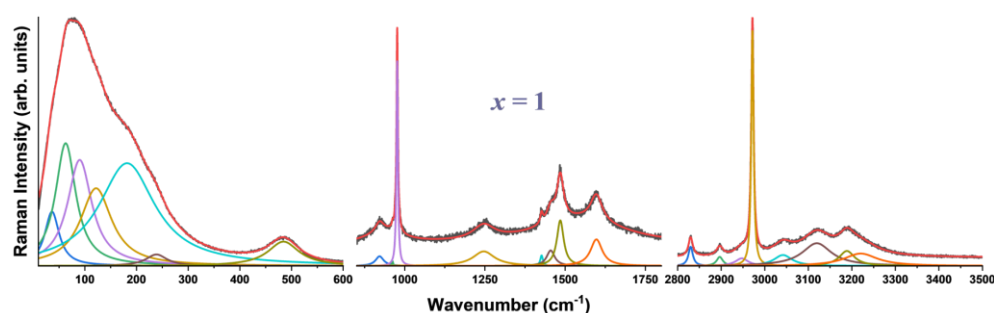

Figure S1. (Color Online) Raman spectra and best-fitted curves of MAPbCl<sub>3</sub> single crystal at room temperature.

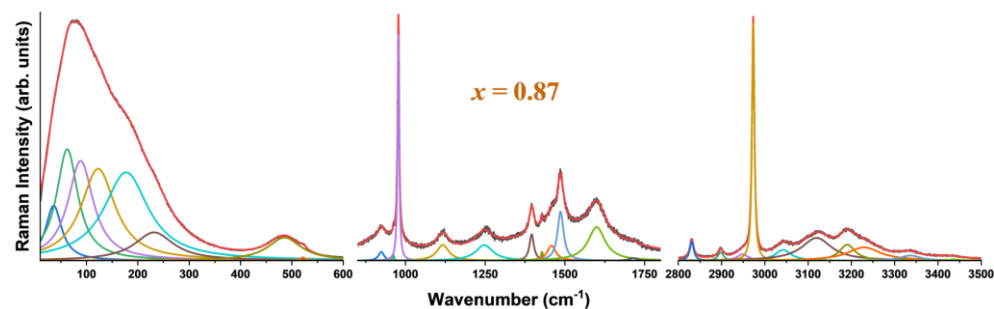

Figure S2. (Color Online) Raman spectra and best-fitted curves of MA<sub>0.87</sub>FA<sub>0.13</sub>PbCl<sub>3</sub> single crystal at room temperature.

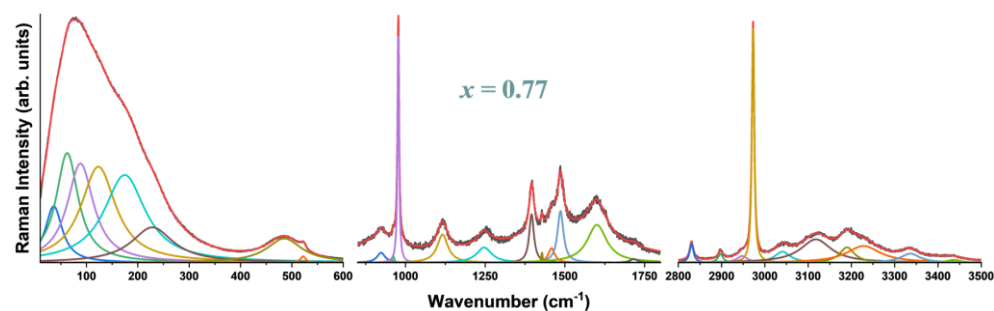

Figure S3. (Color Online) Raman spectra and best-fitted curves of MA<sub>0.77</sub>FA<sub>0.23</sub>PbCl<sub>3</sub> single crystal at room temperature.

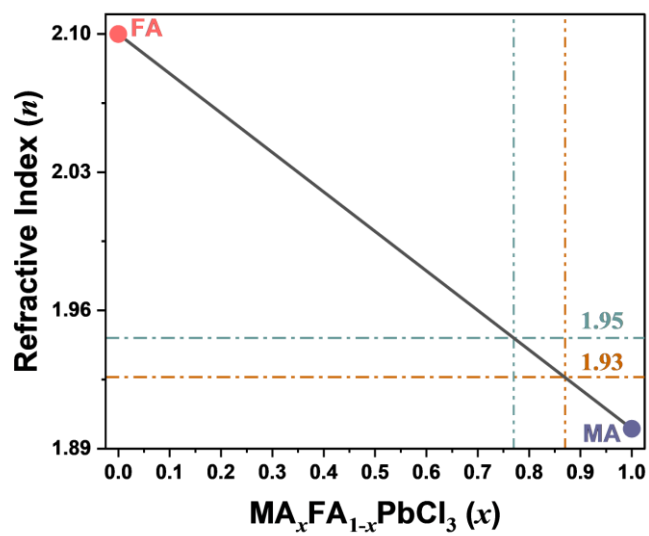

**Figure S4.** (Color Online) Interpolated refractive index for  $\text{MA}_x\text{FA}_{1-x}\text{PbCl}_3$  single crystal. Value of re-fractive index for  $\text{MAPbCl}_3$  [58] and  $\text{FAPbCl}_3$  [33] were interpolated to get values for all mixed com-positions.
